# Supplementary material
Source: publisher figshare collection journal article supplement (https://sage.figshare.com/ndownloader/files/20178995)
Supplement: Supplementary file 1 [file 20178995]

## Sheet: 6h
Category	Term	Count	%	PValue	Genes	List Total	Pop Hits	Pop Total	Fold Enrichment	Bonferroni	Benjamini	FDR
GOTERM_BP_DIRECT	GO:0006508~proteolysis	6	14.2857	0.00631606	ACE, PROZ, LTF, CTSD, HP, C1S2	38	582	18082	4.90559	0.901004	0.206473	8.35043
GOTERM_BP_DIRECT	GO:0010628~positive regulation of gene expression	5	11.9048	0.00868107	ACTC1, MUP20, PF4, MSN, HSPA8	38	399	18082	5.96293	0.958515	0.21714	11.3072
GOTERM_BP_DIRECT	GO:0006953~acute-phase response	4	9.52381	4.93417e-05	SAA2, SAA1, HP, ORM2	38	35	18082	54.382	0.017849	0.017849	0.0678831
GOTERM_BP_DIRECT	GO:0007596~blood coagulation	4	9.52381	0.000670462	F13A1, PROZ, APOH, TFPI	38	84	18082	22.6591	0.217139	0.0783597	0.918758
GOTERM_BP_DIRECT	GO:0032496~response to lipopolysaccharide	4	9.52381	0.00753699	ALDOA, ACE, PPBP, PF4	38	197	18082	9.66177	0.936798	0.222007	9.88806
GOTERM_BP_DIRECT	GO:0006098~pentose-phosphate shunt	3	7.14286	0.000181452	TPI1, TALDO1, TKT	38	10	18082	142.753	0.0640902	0.0325757	0.249428
GOTERM_BP_DIRECT	GO:0006094~gluconeogenesis	3	7.14286	0.00128374	RBP4, TPI1, PGAM1	38	26	18082	54.9049	0.374289	0.110607	1.7523
GOTERM_BP_DIRECT	GO:0006096~glycolytic process	3	7.14286	0.00245666	ALDOA, TPI1, PGAM1	38	36	18082	39.6535	0.592529	0.16436	3.32839
GOTERM_BP_DIRECT	GO:0030168~platelet activation	3	7.14286	0.00287838	PF4, TREML1, MERTK	38	39	18082	36.6032	0.650804	0.16084	3.8893
GOTERM_BP_DIRECT	GO:0007599~hemostasis	3	7.14286	0.0039844	F13A1, PROZ, TFPI	38	46	18082	31.0332	0.767115	0.187933	5.34611
GOTERM_BP_DIRECT	GO:0031100~organ regeneration	3	7.14286	0.00585286	ACE, APOH, LCP1	38	56	18082	25.4915	0.882647	0.211847	7.76072
GOTERM_BP_DIRECT	GO:0046166~glyceraldehyde-3-phosphate biosynthetic process	2	4.7619	0.00408839	TPI1, TKT	38	2	18082	475.842	0.775824	0.170486	5.48203
GOTERM_BP_DIRECT	GO:0019682~glyceraldehyde-3-phosphate metabolic process	2	4.7619	0.00408839	TPI1, TALDO1	38	2	18082	475.842	0.775824	0.170486	5.48203
GOTERM_BP_DIRECT	GO:0048525~negative regulation of viral process	2	4.7619	0.00816052	APCS, LTF	38	4	18082	237.921	0.949753	0.220603	10.6641
GOTERM_BP_DIRECT	GO:0072378~blood coagulation, fibrin clot formation	2	4.7619	0.0101905	FBLN1, F13A1	38	5	18082	190.337	0.976213	0.234361	13.1478
GOTERM_BP_DIRECT	GO:0009052~pentose-phosphate shunt, non-oxidative branch	2	4.7619	0.0101905	TALDO1, TKT	38	5	18082	190.337	0.976213	0.234361	13.1478
GOTERM_BP_DIRECT	GO:0060068~vagina development	2	4.7619	0.0222858	RBP4, MERTK	38	11	18082	86.5167	0.999732	0.422139	26.6676
GOTERM_BP_DIRECT	GO:0071803~positive regulation of podosome assembly	2	4.7619	0.0262855	MSN, LCP1	38	13	18082	73.2065	0.99994	0.455376	30.6901
GOTERM_BP_DIRECT	GO:0002690~positive regulation of leukocyte chemotaxis	2	4.7619	0.0302693	PPBP, PF4	38	15	18082	63.4456	0.999987	0.483117	34.4924
GOTERM_BP_DIRECT	GO:0060047~heart contraction	2	4.7619	0.0342372	ACE, ACTC1	38	17	18082	55.9814	0.999997	0.506592	38.0864
GOTERM_BP_DIRECT	GO:0001895~retina homeostasis	2	4.7619	0.0499516	ACTB, LTF	38	25	18082	38.0674	1	0.626334	50.5991
GOTERM_CC_DIRECT	GO:0005615~extracellular space	28	66.6667	2.95281e-22	ALDOA, RBP4, YWHAZ, PF4, HP, ACE, TPI1, SAA2, SAA1, PROZ, APOH, LTF, MSN, HSPA8, SPP1, ACTB, ACTC1, APCS, CLEC11A, FBLN1, MUP20, PPBP, TFPI, CTSD, MERTK, IGFBP3, LCP1, ORM2	39	1504	19662	9.38584	3.57291e-20	3.57291e-20	3.39472e-19
GOTERM_CC_DIRECT	GO:0070062~extracellular exosome	26	61.9048	1.76321e-13	ALDOA, RBP4, YWHAZ, TALDO1, PGAM1, HP, ACE, TPI1, SAA2, SAA1, PROZ, APOH, LTF, MSN, HSPA8, SPP1, ACTB, ACTC1, APCS, TKT, FBLN1, CTSD, FCGBP, C1S2, IGFBP3, LCP1	39	2674	19662	4.90202	2.13327e-11	1.06664e-11	2.02693e-10
GOTERM_CC_DIRECT	GO:0005576~extracellular region	20	47.619	6.93569e-11	RBP4, APCS, F13A1, PF4, HP, CLEC11A, FBLN1, ACE, MUP20, SAA2, SAA1, PROZ, APOH, TFPI, CTSD, LTF, IGFBP3, C1S2, ORM2, SPP1	39	1753	19662	5.7519	8.39219e-09	2.09805e-09	7.97367e-08
GOTERM_CC_DIRECT	GO:0072562~blood microparticle	10	23.8095	3.11302e-12	ACTB, ACTC1, YWHAZ, APCS, F13A1, HP, MSN, IGLC2, C1S2, HSPA8	39	133	19662	37.9063	3.76681e-10	1.2556e-10	3.57896e-09
GOTERM_CC_DIRECT	GO:0043234~protein complex	8	19.0476	0.000174706	ALDOA, ACTB, RBP4, YWHAZ, APCS, LTF, PF4, HSPA8	39	628	19662	6.42234	0.0209194	0.00351735	0.200668
GOTERM_CC_DIRECT	GO:0009986~cell surface	7	16.6667	0.00120711	SELL, APOH, TFPI, LTF, MSN, TREML1, HSPA8	39	629	19662	5.61062	0.135971	0.0145086	1.37901
GOTERM_CC_DIRECT	GO:0043209~myelin sheath	6	14.2857	3.25627e-05	ALDOA, ACTB, PGAM1, TKT, MSN, HSPA8	39	192	19662	15.7548	0.0039324	0.000787721	0.0374296
GOTERM_CC_DIRECT	GO:0005925~focal adhesion	6	14.2857	0.000886586	ACTB, ACTC1, YWHAZ, MSN, LCP1, HSPA8	39	391	19662	7.73638	0.101766	0.0118541	1.01454
GOTERM_CC_DIRECT	GO:0031982~vesicle	5	11.9048	0.000276092	ACE, PF4, TKT, MSN, SPP1	39	164	19662	15.3705	0.0328597	0.00476173	0.316951
GOTERM_CC_DIRECT	GO:0031012~extracellular matrix	5	11.9048	0.00242283	FBLN1, APCS, APOH, CTSD, HSPA8	39	294	19662	8.57405	0.254364	0.0263306	2.75028
GOTERM_CC_DIRECT	GO:0034364~high-density lipoprotein particle	3	7.14286	0.000746281	SAA2, SAA1, APOH	39	21	19662	72.022	0.0863738	0.0112282	0.854615
GOTERM_CC_DIRECT	GO:0030175~filopodium	3	7.14286	0.00971428	ACTC1, MSN, LCP1	39	77	19662	19.6424	0.693082	0.093742	10.6159
GOTERM_CC_DIRECT	GO:0042470~melanosome	3	7.14286	0.0162864	YWHAZ, CTSD, HSPA8	39	101	19662	14.9749	0.862877	0.14173	17.2031
GOTERM_CC_DIRECT	GO:0031091~platelet alpha granule	2	4.7619	0.0286111	PF4, TREML1	39	15	19662	67.2205	0.970176	0.22189	28.375
GOTERM_MF_DIRECT	GO:0030246~carbohydrate binding	6	14.2857	0.000115431	APCS, TALDO1, CLEC4F, SELL, TKT, CLEC11A	38	229	17446	12.029	0.0153496	0.0153496	0.135066
GOTERM_MF_DIRECT	GO:0042802~identical protein binding	6	14.2857	0.00980534	ACTB, FBLN1, YWHAZ, APOH, C1S2, LCP1	38	625	17446	4.40741	0.732971	0.281148	10.8964
GOTERM_MF_DIRECT	GO:0008201~heparin binding	4	9.52381	0.00398111	SAA1, APOH, LTF, PF4	38	151	17446	12.1617	0.414057	0.234531	4.56312
GOTERM_MF_DIRECT	GO:0004252~serine-type endopeptidase activity	4	9.52381	0.0101442	PROZ, LTF, HP, C1S2	38	212	17446	8.66236	0.744943	0.2391	11.2528
GOTERM_MF_DIRECT	GO:0001664~G-protein coupled receptor binding	3	7.14286	0.00812317	SAA2, SAA1, HSPA8	38	64	17446	21.5206	0.664774	0.305329	9.10788
GOTERM_MF_DIRECT	GO:0051861~glycolipid binding	2	4.7619	0.0147542	CLEC4F, SELL	38	7	17446	131.173	0.86355	0.282488	15.9732
GOTERM_MF_DIRECT	GO:0045236~CXCR chemokine receptor binding	2	4.7619	0.0230899	PPBP, PF4	38	11	17446	83.4737	0.956296	0.360577	23.9298
GOTERM_MF_DIRECT	GO:0048029~monosaccharide binding	2	4.7619	0.033413	TALDO1, TKT	38	16	17446	57.3882	0.989473	0.43404	32.8267

## Sheet: 24h
Category	Term	Count	%	PValue	Genes	List Total	Pop Hits	Pop Total	Fold Enrichment	Bonferroni	Benjamini	FDR
GOTERM_BP_DIRECT	GO:0006508~proteolysis	7	19.4444	0.000333	PSMA1, PSMB1, PSMA5, PSMA3, F9, HP, CPB2	31	582	18082	7.01552	0.0702813	0.014469	0.422371
GOTERM_BP_DIRECT	GO:0006953~acute-phase response	5	13.8889	3.11e-07	SAA2, SAA1, ITIH4, HP, ORM2	31	35	18082	83.3272	6.81e-05	6.81e-05	0.000396
GOTERM_BP_DIRECT	GO:0007596~blood coagulation	5	13.8889	1.08e-05	APOH, F9, SERPING1, MMRN1, CPB2	31	84	18082	34.7197	0.00236909	0.00118525	0.0137756
GOTERM_BP_DIRECT	GO:0002479~antigen processing and presentation of exogenous peptide antigen via MHC class I, TAP-dependent	4	11.1111	1.62e-05	PSMA1, PSMB1, PSMA5, PSMA3	31	30	18082	77.772	0.00354875	0.00118432	0.0206466
GOTERM_BP_DIRECT	GO:0051603~proteolysis involved in cellular protein catabolic process	4	11.1111	0.000114	PSMA1, PSMB1, PSMA5, PSMA3	31	57	18082	40.9327	0.024553	0.00619559	0.144286
GOTERM_BP_DIRECT	GO:0002376~immune system process	4	11.1111	0.0250787	MBL2, PSMA1, SERPING1, HP	31	383	18082	6.0918	0.99616	0.370936	27.6077
GOTERM_BP_DIRECT	GO:0045087~innate immune response	4	11.1111	0.0280464	MBL2, APCS, SERPING1, PTX3	31	400	18082	5.8329	0.99803	0.359173	30.3613
GOTERM_BP_DIRECT	GO:0007599~hemostasis	3	8.33333	0.00263202	F9, SERPING1, CPB2	31	46	18082	38.0407	0.438516	0.0917134	3.29679
GOTERM_BP_DIRECT	GO:0006511~ubiquitin-dependent protein catabolic process	3	8.33333	0.026823	PSMA1, PSMA5, PSMA3	31	154	18082	11.3628	0.997406	0.367474	29.2381
GOTERM_BP_DIRECT	GO:1903016~negative regulation of exo-alpha-sialidase activity	2	5.55556	0.00331556	APCS, PTX3	31	2	18082	583.29	0.516794	0.0986863	4.13643
GOTERM_BP_DIRECT	GO:0044871~negative regulation by host of viral glycoprotein metabolic process	2	5.55556	0.00331556	APCS, PTX3	31	2	18082	583.29	0.516794	0.0986863	4.13643
GOTERM_BP_DIRECT	GO:0044869~negative regulation by host of viral exo-alpha-sialidase activity	2	5.55556	0.00331556	APCS, PTX3	31	2	18082	583.29	0.516794	0.0986863	4.13643
GOTERM_BP_DIRECT	GO:1903019~negative regulation of glycoprotein metabolic process	2	5.55556	0.00331556	APCS, PTX3	31	2	18082	583.29	0.516794	0.0986863	4.13643
GOTERM_BP_DIRECT	GO:0048525~negative regulation of viral process	2	5.55556	0.00662048	MBL2, APCS	31	4	18082	291.645	0.766531	0.166264	8.10219
GOTERM_BP_DIRECT	GO:0051918~negative regulation of fibrinolysis	2	5.55556	0.011558	APOH, CPB2	31	7	18082	166.654	0.921601	0.246392	13.7461
GOTERM_BP_DIRECT	GO:0043589~skin morphogenesis	2	5.55556	0.0181045	COL1A2, COL1A1	31	11	18082	106.053	0.981707	0.329762	20.7372
GOTERM_BP_DIRECT	GO:0042730~fibrinolysis	2	5.55556	0.0246091	SERPING1, CPB2	31	15	18082	77.772	0.995733	0.391083	27.1629
GOTERM_BP_DIRECT	GO:0070208~protein heterotrimerization	2	5.55556	0.031072	COL1A2, COL1A1	31	19	18082	61.399	0.999005	0.369252	33.069
GOTERM_BP_DIRECT	GO:0045780~positive regulation of bone resorption	2	5.55556	0.0326812	TRF, SPP1	31	20	18082	58.329	0.999309	0.365423	34.4693
GOTERM_BP_DIRECT	GO:0046597~negative regulation of viral entry into host cell	2	5.55556	0.0326812	APCS, PTX3	31	20	18082	58.329	0.999309	0.365423	34.4693
GOTERM_CC_DIRECT	GO:0070062~extracellular exosome	23	63.8889	4.67e-13	BPIFA2, APCS, EFEMP1, PGAM1, F9, HP, TKT, SERPING1, TRF, PSMA1, PSMB1, SAA2, PSMA5, LRG1, SAA1, PSMA3, APOH, COL1A2, ITIH4, MFAP4, CPB2, LCP1, SPP1	32	2674	19662	5.28499	3.41e-11	1.14e-11	4.88e-10
GOTERM_CC_DIRECT	GO:0005576~extracellular region	22	61.1111	1.53e-15	MBL2, BPIFA2, APCS, EFEMP1, F9, HP, SERPING1, PF4, MMRN1, TRF, SAA2, SAA1, APOH, COL1A2, PLA2G7, ITIH4, COL1A1, PTX3, MFAP4, CPB2, ORM2, SPP1	32	1753	19662	7.71114	1.13e-13	1.13e-13	1.62e-12
GOTERM_CC_DIRECT	GO:0005615~extracellular space	20	55.5556	3.19e-14	MBL2, APCS, EFEMP1, F9, HP, SERPING1, PF4, TRF, SAA2, LRG1, SAA1, APOH, PLA2G7, COL1A2, COL1A1, PTX3, CPB2, ORM2, LCP1, SPP1	32	1504	19662	8.17071	2.33e-12	1.17e-12	3.34e-11
GOTERM_CC_DIRECT	GO:0031012~extracellular matrix	7	19.4444	5.71e-06	APCS, EFEMP1, COL1A2, APOH, COL1A1, MMRN1, MFAP4	32	294	19662	14.6295	0.000417	8.33e-05	0.00595872
GOTERM_CC_DIRECT	GO:0072562~blood microparticle	5	13.8889	5.46e-05	APCS, ITIH4, SERPING1, HP, TRF	32	133	19662	23.0992	0.00398091	0.000665	0.0570186
GOTERM_CC_DIRECT	GO:0005839~proteasome core complex	4	11.1111	3.97e-06	PSMA1, PSMB1, PSMA5, PSMA3	32	20	19662	122.888	0.00029	7.25e-05	0.00414655
GOTERM_CC_DIRECT	GO:0000502~proteasome complex	4	11.1111	0.000152	PSMA1, PSMB1, PSMA5, PSMA3	32	66	19662	37.2386	0.0110227	0.00138452	0.158358
GOTERM_CC_DIRECT	GO:0031982~vesicle	4	11.1111	0.00215735	PF4, TKT, TRF, SPP1	32	164	19662	14.9863	0.145857	0.015642	2.22904
GOTERM_CC_DIRECT	GO:0005578~proteinaceous extracellular matrix	4	11.1111	0.0132531	EFEMP1, COL1A2, COL1A1, MFAP4	32	316	19662	7.77769	0.622409	0.0721812	12.9998
GOTERM_CC_DIRECT	GO:0019773~proteasome core complex, alpha-subunit complex	3	8.33333	8.6e-05	PSMA1, PSMA5, PSMA3	32	9	19662	204.812	0.00625951	0.000897	0.0897429
GOTERM_CC_DIRECT	GO:0034364~high-density lipoprotein particle	3	8.33333	0.000496	SAA2, SAA1, APOH	32	21	19662	87.7768	0.0355589	0.00401487	0.516363
GOTERM_CC_DIRECT	GO:0005581~collagen trimer	3	8.33333	0.00756172	MBL2, COL1A2, COL1A1	32	83	19662	22.2086	0.425413	0.0451254	7.61713
GOTERM_CC_DIRECT	GO:0005584~collagen type I trimer	2	5.55556	0.00315088	COL1A2, COL1A1	32	2	19662	614.438	0.205766	0.0207256	3.2404
GOTERM_MF_DIRECT	GO:0016787~hydrolase activity	8	22.2222	0.0111016	PSMA1, PSMB1, PSMA5, PSMA3, PLA2G7, PGAM1, F9, CPB2	30	1533	17446	3.03475	0.57667	0.157954	11.1112
GOTERM_MF_DIRECT	GO:0005509~calcium ion binding	7	19.4444	0.000873	MBL2, APCS, EFEMP1, ITIH4, F9, MMRN1, LCP1	30	699	17446	5.82365	0.065048	0.0221706	0.917369
GOTERM_MF_DIRECT	GO:0008233~peptidase activity	6	16.6667	0.00146442	PSMA1, PSMB1, PSMA5, PSMA3, F9, CPB2	30	516	17446	6.76202	0.106709	0.0278166	1.53429
GOTERM_MF_DIRECT	GO:0004175~endopeptidase activity	5	13.8889	3.38e-05	PSMA1, PSMB1, PSMA5, PSMA3, F9	30	112	17446	25.9613	0.00259735	0.00129952	0.035629
GOTERM_MF_DIRECT	GO:0042802~identical protein binding	5	13.8889	0.019027	COL1A2, APOH, COL1A1, PTX3, LCP1	30	625	17446	4.65227	0.772179	0.168812	18.3461
GOTERM_MF_DIRECT	GO:0004298~threonine-type endopeptidase activity	4	11.1111	7.15e-06	PSMA1, PSMB1, PSMA5, PSMA3	30	23	17446	101.136	0.000551	0.000551	0.00754526
GOTERM_MF_DIRECT	GO:0008201~heparin binding	3	8.33333	0.0259333	SAA1, APOH, PF4	30	151	17446	11.5536	0.867771	0.183168	24.2114
GOTERM_MF_DIRECT	GO:0046790~virion binding	2	5.55556	0.01158	APCS, PTX3	30	7	17446	166.152	0.592154	0.138842	11.5638
GOTERM_MF_DIRECT	GO:0001849~complement component C1q binding	2	5.55556	0.0132237	APCS, PTX3	30	8	17446	145.383	0.64121	0.136215	13.1032
GOTERM_MF_DIRECT	GO:0048407~platelet-derived growth factor binding	2	5.55556	0.0197721	COL1A2, COL1A1	30	12	17446	96.9222	0.785126	0.157057	18.9981
GOTERM_MF_DIRECT	GO:0001530~lipopolysaccharide binding	2	5.55556	0.0343529	PSMA1, BPIFA2	30	21	17446	55.3841	0.932233	0.217059	30.8447
GOTERM_MF_DIRECT	GO:0042056~chemoattractant activity	2	5.55556	0.0407658	SAA2, SAA1	30	25	17446	46.5227	0.959431	0.234374	35.5394

## Sheet: 72h
Category	Term	Count	%	PValue	Genes	List Total	Pop Hits	Pop Total	Fold Enrichment	Bonferroni	Benjamini	FDR
GOTERM_BP_DIRECT	GO:0006508~proteolysis	6	17.6471	0.00127427	CTSZ, FAP, LTF, ANPEP, HP, MMP2	27	582	18082	6.90416	0.293969	0.159744	1.66535
GOTERM_BP_DIRECT	GO:0007155~cell adhesion	5	14.7059	0.0047836	VCAM1, SELL, TNC, FAP, CDH5	27	485	18082	6.90416	0.729925	0.230344	6.12016
GOTERM_BP_DIRECT	GO:0002376~immune system process	4	11.7647	0.0170854	MBL2, FGB, LTF, HP	27	383	18082	6.99429	0.990947	0.324331	20.3056
GOTERM_BP_DIRECT	GO:0045087~innate immune response	4	11.7647	0.019159	MBL2, APCS, FGB, IGHV3-5	27	400	18082	6.69704	0.994913	0.314238	22.4917
GOTERM_BP_DIRECT	GO:0048525~negative regulation of viral process	3	8.82353	1.19077e-05	MBL2, APCS, LTF	27	4	18082	502.278	0.00324553	0.00324553	0.0156821
GOTERM_BP_DIRECT	GO:0051603~proteolysis involved in cellular protein catabolic process	3	8.82353	0.00302252	CTSZ, FAP, HSPA5	27	57	18082	35.2476	0.562377	0.240782	3.90847
GOTERM_BP_DIRECT	GO:0042542~response to hydrogen peroxide	3	8.82353	0.00312771	HP, COL1A1, MMP2	27	58	18082	34.6398	0.574803	0.192491	4.04191
GOTERM_BP_DIRECT	GO:0071230~cellular response to amino acid stimulus	3	8.82353	0.0164442	COL1A2, COL1A1, MMP2	27	137	18082	14.665	0.989183	0.33735	19.6182
GOTERM_BP_DIRECT	GO:0042742~defense response to bacterium	3	8.82353	0.0305506	BPIFA2, HP, IGHV3-5	27	191	18082	10.5189	0.99979	0.411041	33.5452
GOTERM_BP_DIRECT	GO:0030335~positive regulation of cell migration	3	8.82353	0.0341611	COL1A1, HSPA5, MMP2	27	203	18082	9.8971	0.999924	0.427748	36.732
GOTERM_BP_DIRECT	GO:0001525~angiogenesis	3	8.82353	0.045924	FAP, ANPEP, MMP2	27	239	18082	8.40632	0.999997	0.509835	46.1614
GOTERM_BP_DIRECT	GO:0014012~peripheral nervous system axon regeneration	2	5.88235	0.00716962	TNC, MMP2	27	5	18082	267.881	0.859754	0.279199	9.0417
GOTERM_BP_DIRECT	GO:0001957~intramembranous ossification	2	5.88235	0.0085976	COL1A1, MMP2	27	6	18082	223.235	0.905324	0.285917	10.7497
GOTERM_BP_DIRECT	GO:0001955~blood vessel maturation	2	5.88235	0.0100236	MMP2, CDH5	27	7	18082	191.344	0.936088	0.290916	12.4258
GOTERM_BP_DIRECT	GO:0060346~bone trabecula formation	2	5.88235	0.0128697	COL1A1, MMP2	27	9	18082	148.823	0.970877	0.324914	15.6844
GOTERM_BP_DIRECT	GO:0043589~skin morphogenesis	2	5.88235	0.0157079	COL1A2, COL1A1	27	11	18082	121.764	0.986731	0.35094	18.822
GOTERM_BP_DIRECT	GO:0060740~prostate gland epithelium morphogenesis	2	5.88235	0.0171241	TNC, MMP2	27	12	18082	111.617	0.991043	0.304219	20.3469
GOTERM_BP_DIRECT	GO:0070208~protein heterotrimerization	2	5.88235	0.0269826	COL1A2, COL1A1	27	19	18082	70.4951	0.999429	0.392151	30.2506
GOTERM_BP_DIRECT	GO:0006953~acute-phase response	2	5.88235	0.0491605	HP, ORM2	27	35	18082	38.2688	0.999999	0.515342	48.5178
GOTERM_CC_DIRECT	GO:0005615~extracellular space	18	52.9412	5.77851e-14	MBL2, CTSZ, APCS, TNC, MUP3, IGKV4-71, ANPEP, HP, MMP2, VCAM1, TFRC, FGB, FAP, CES2A, COL1A2, LTF, COL1A1, ORM2	26	1504	19662	9.05063	4.84945e-12	4.84945e-12	6.19726e-11
GOTERM_CC_DIRECT	GO:0005576~extracellular region	16	47.0588	2.33079e-10	MBL2, BPIFA2, APCS, MUP3, TNC, HP, MMP2, TFRC, FGB, FAP, COL1A2, LTF, COL1A1, HSPA5, ORM2, AI182371	26	1753	19662	6.90228	1.95786e-08	9.78932e-09	2.50183e-07
GOTERM_CC_DIRECT	GO:0070062~extracellular exosome	13	38.2353	3.62334e-05	CTSZ, BPIFA2, APCS, ANPEP, HP, VCAM1, CEP250, TFRC, FGB, COL1A2, MAN1A, LTF, HSPA5	26	2674	19662	3.67651	0.00303903	0.000434714	0.0388855
GOTERM_CC_DIRECT	GO:0009986~cell surface	8	23.5294	9.64333e-06	VCAM1, TFRC, SELL, FGB, FAP, LTF, HSPA5, CDH5	26	629	19662	9.6182	0.000809716	0.00020249	0.0103505
GOTERM_CC_DIRECT	GO:0009897~external side of plasma membrane	7	20.5882	2.29112e-06	VCAM1, TFRC, SELL, FGB, ANPEP, IGHV3-5, CDH5	26	317	19662	16.6991	0.000192436	6.41495e-05	0.00245923
GOTERM_CC_DIRECT	GO:0031012~extracellular matrix	6	17.6471	3.00303e-05	APCS, TNC, COL1A2, COL1A1, HSPA5, MMP2	26	294	19662	15.4333	0.00251941	0.000420343	0.0322294
GOTERM_CC_DIRECT	GO:0005783~endoplasmic reticulum	6	17.6471	0.023506	VCAM1, CTSZ, MAN1A, HP, COL1A1, HSPA5	26	1323	19662	3.42962	0.864404	0.142469	22.5333
GOTERM_CC_DIRECT	GO:0072562~blood microparticle	5	14.7059	2.26691e-05	APCS, TFRC, FGB, HP, IGHV3-5	26	133	19662	28.4297	0.00190241	0.000380772	0.02433
GOTERM_CC_DIRECT	GO:0005578~proteinaceous extracellular matrix	4	11.7647	0.00727792	TNC, COL1A2, COL1A1, MMP2	26	316	19662	9.57254	0.458591	0.0542529	7.54108
GOTERM_CC_DIRECT	GO:0005793~endoplasmic reticulum-Golgi intermediate compartment	3	8.82353	0.00335855	MAN1A, ANPEP, HSPA5	26	68	19662	33.3631	0.246173	0.0309114	3.54666
GOTERM_CC_DIRECT	GO:0005581~collagen trimer	3	8.82353	0.00495906	MBL2, COL1A2, COL1A1	26	83	19662	27.3336	0.341373	0.0408998	5.19634
GOTERM_CC_DIRECT	GO:0030141~secretory granule	3	8.82353	0.00885683	BPIFA2, LTF, COL1A1	26	112	19662	20.2562	0.526351	0.0603746	9.10738
GOTERM_CC_DIRECT	GO:0005584~collagen type I trimer	2	5.88235	0.00254142	COL1A2, COL1A1	26	2	19662	756.231	0.192451	0.0263651	2.69443
GOTERM_MF_DIRECT	GO:0016787~hydrolase activity	7	20.5882	0.0226875	CTSZ, FAP, CES2A, MAN1A, LTF, ANPEP, MMP2	27	1533	17446	2.95045	0.854518	0.274783	21.8335
GOTERM_MF_DIRECT	GO:0008233~peptidase activity	5	14.7059	0.00674349	CTSZ, FAP, LTF, ANPEP, MMP2	27	516	17446	6.26113	0.433553	0.172592	7.0054
GOTERM_MF_DIRECT	GO:0004252~serine-type endopeptidase activity	4	11.7647	0.00374279	FAP, LTF, HP, MMP2	27	212	17446	12.1915	0.270199	0.270199	3.94506
GOTERM_MF_DIRECT	GO:0050839~cell adhesion molecule binding	3	8.82353	0.00498245	VCAM1, SELL, FGB	27	71	17446	27.302	0.342672	0.189242	5.22026
GOTERM_MF_DIRECT	GO:0002020~protease binding	3	8.82353	0.0130473	MBL2, SELL, FAP	27	117	17446	16.5679	0.668188	0.241033	13.1484
GOTERM_MF_DIRECT	GO:0030246~carbohydrate binding	3	8.82353	0.045351	MBL2, APCS, SELL	27	229	17446	8.46482	0.979729	0.38573	39.2361
GOTERM_MF_DIRECT	GO:0048407~platelet-derived growth factor binding	2	5.88235	0.0177434	COL1A2, COL1A1	27	12	17446	107.691	0.777723	0.259749	17.483
GOTERM_MF_DIRECT	GO:0001968~fibronectin binding	2	5.88235	0.0423626	TNC, MMP2	27	29	17446	44.5619	0.973643	0.405142	37.163
Supplementary Table 3
